# Supplementary material for: Influences of oxygen and temperature interaction on the antibacterial activity, antioxidant activity, serum biochemical indices, blood indices and growth performance of crucian carp
Source: PeerJ. 2023 Jan 3;11:e14530. doi: 10.7717/peerj.14530 (PMC9817939; doi:10.7717/peerj.14530)
Supplement: Supplemental Information 1 [file peerj-11-14530-s001.xlsx]

## Sheet: Antibacterial test
Serum antibacterial test
Time (h)	L18					M18					H18					L24					M24					H24					L30					M30					H30
				average	sd				average	sd				average	sd				average	sd				average	sd				average	sd				average	sd				average	sd				average	sd
0	95.8	98.9	97.5	97.4	1.26754	97.3	96.8	97.5	97.2	0.294392	94.9	95.2	96.4	95.5	0.648074	95.3	96	98.2	96.5	1.23558	96	95	97.9	96.3	1.20277	94.3	95.5	95.5	95.1	0.565685	98.3	99.4	99.3	99	0.496655	99.5	97.2	99.4	98.7	1.06145	98.6	97.1	96.7672	97.4891	0.797208
1	92.5	96.3	93.5	94.1	1.60831	93.1	92.7	94.7	93.5	0.864099	95.1	93.8	94	94.3	0.571548	94.7	93.8	94.7	94.4	0.424264	94.3	92.5	95.2	94	1.1225	91.6	92	93	92.2	0.588784	96.2	94.7	96.2	95.7	0.707107	96.6	94.5	95.7	95.6	0.860233	94.5	96.7	94.9803	95.3934	0.944458
2	92.5	95.3	91.8	93.2	1.51217	91.8	92.2	96.2	93.4	1.98662	88	87.5	90.6	88.7	1.35892	92	94.1	93.5	93.2	0.883176	93	94.6	94.1	93.9	0.668331	90.7	91.4	90.3	90.8	0.454606	90.2	92.4	91.3	91.3	0.898146	93.8	95.2	93.3	94.1	0.804156	90.5	92.3	90.5885	91.1295	0.828457
3	85.7	88.4	92	88.7	2.5807	83.8	85.7	86.7	85.4	1.20277	83.5	84	84.5	84	0.408248	89.8	90	93.2	91	1.55778	89.2	88	88.9	88.7	0.509902	83.5	86	84.6	84.7	1.02307	89.3	90.5	85.7	88.5	2.03961	88.4	86.3	89	87.9	1.15758	89	87.6	87.793	88.131	0.619512
4	83.2	85.6	84.1	84.3	0.989949	83.1	82	83.3	82.8	0.571548	80	81.4	81.3	80.9	0.637704	88	87.5	90.6	88.7	1.35892	84.5	86.3	85.7	85.5	0.748331	80.6	82.2	81.1	81.3	0.668331	86.4	84.5	86.2	85.7	0.852447	85	87.4	86.5	86.3	0.989949	85.6	87.2	85.7393	86.1798	0.723644
5	82.2	85.9	84.2	84.1	1.51217	81.9	84.2	82.9	83	0.94163	80.2	78.8	80.1	79.7	0.637704	82.3	84	88.4	84.9	2.57034	81.4	82	84.1	82.5	1.15758	80.5	78.8	79.2	79.5	0.725718	83	84	82.6	83.2	0.588784	83.5	86.1	84.8	84.8	1.06145	83.1	85.3	84.7939	84.398	0.940767
6	80.9	78.6	82.9	80.8	1.75689	79.3	77.6	78	78.3	0.725718	75.3	76	78.2	76.5	1.23558	81.5	83.3	81.8	82.2	0.787401	78.8	79.6	79.5	79.3	0.355903	77	78.5	77.3	77.6	0.648074	81.9	82.3	82.4	82.2	0.216025	81.8	83.5	82.2	82.5	0.725718	80.5	82.3	81.0799	81.2933	0.75018
7	77.3	79.2	79	78.5	0.852447	76.4	78.4	77.7	77.5	0.828654	74	72.1	73.5	73.2	0.804156	78	77.5	80.6	78.7	1.35892	78.2	77.4	80.2	78.6	1.17757	75.1	74.3	76.5	75.3	0.909212	79.9	82.3	80.8	81	0.989949	79.8	81.3	81.6	80.9	0.787401	78.4	80.7	80.7265	79.9422	1.09054
8	75.4	78.6	74.9	76.3	1.63911	76.1	74.3	75.2	75.2	0.734847	71.8	73.4	71.7	72.3	0.778888	77	75.4	80.4	77.6	2.08487	76.2	74.3	76.9	75.8	1.09848	72	73.6	71	72.2	1.07083	78.8	81.2	78.5	79.5	1.2083	77.8	79.6	77.5	78.3	0.927362	77.1	79.4	77.5422	78.0141	0.996495
9	74.4	76.1	76	75.5	0.778888	71.3	72.9	73.6	72.6	0.962635	72.2	70	69.3	70.5	1.23558	74.5	76.2	75.2	75.3	0.697615	73.7	72.5	73.4	73.2	0.509902	70.9	70	73.6	71.5	1.52971	77.3	79.8	77.2	78.1	1.20277	76.8	78.3	78	77.7	0.648074	75.4	77.8	77.1333	76.7778	1.01154
10	73.3	74.2	75.4	74.3	0.860233	75.3	74	72.1	73.8	1.31403	66	68	68.5	67.5	1.08012	72.5	71.3	75.8	73.2	1.90263	71	71.9	72.8	71.9	0.734847	68.7	70.3	69.5	69.5	0.653197	79.4	80.2	75.51	78.37	2.04853	74.3	76.2	75.4	75.3	0.778888	73.9	75.6	72.7105	74.0702	1.18574
11	71.2	72.5	72.3	72	0.571548	71	74	71.3	72.1	1.34907	65.2	63.6	64.1	64.3	0.668331	71.7	72.5	74.5	72.9	1.17757	71.6	70.8	71.5	71.3	0.355903	67.2	68	71.2	68.8	1.7282	76.7	78.5	77.6	77.6	0.734847	75.4	76.9	76	76.1	0.616441	74.4	76.8	74.2576	75.1525	1.16638
12	70.5	71.1	72.9	71.5	1.0198	70.6	68.8	70	69.8	0.748331	61.7	63.4	62.1	62.4	0.725718	73	71.4	71.9	72.1	0.668331	69.4	70.6	70.6	70.2	0.565685	65	66.4	65.1	65.5	0.637704	75	76.8	76.8	76.2	0.848528	76.8	74.3	75.4	75.5	1.02307	74.5	72.9	73.5954	73.6651	0.655057

## Sheet: CAT
CAT
treatment				sd	average
18L	1.96	2.25	2.09	0.118603	2.1
18M	2.38	2.66	2.46	0.117757	2.5
18H	2.77	3.08	3.06	0.141657	2.97
24L	1.55	1.92	1.87	0.163911	1.78
24M	3.38	3.72	3.28	0.188326	3.46
24H	3.75	4.1	4.21	0.196129	4.02
30L	1.28	1.16	1.55	0.163095	1.33
30M	3.66	4.01	3.97	0.156418	3.88
30H	4.48	4.82	4.35	0.198158	4.55

## Sheet: GPx
GPx
treatment				average	sd
18L	126	132	126	128	2.82843
18M	132	138	135	135	2.44949
18H	155	164	158	159	3.74166
24L	111	120	120	117	4.24264
24M	148	157	151	152	3.74166
24H	184	172	184	180	5.65685
30L	101	109	99	103	4.32049
30M	162	174	168	168	4.89898
30H	191	205	198	198	5.71548

## Sheet: SOD
SOD
treatment				sd	average
18L	34.2	37.2	34.8	1.29615	35.4
18M	47.5	50.3	47.4	1.34412	48.4
18H	57.2	61.7	59.9	1.84932	59.6
24L	37.9	41.2	39.7	1.34907	39.6
24M	54.8	58.1	56	1.36382	56.3
24H	60.6	65	62.8	1.79629	62.8
30L	30.4	34.3	31.6	1.63095	32.1
30M	41.1	45.3	44.1	1.76635	43.5
30H	56	59	56.3	1.34907	57.1

## Sheet: Glucose
Glucose
treatment				average	sd
18L	53	56	56	55	1.41421
18M	52	61	61	58	4.24264
18H	62	69	67	66	2.94392
24L	58	59	63	60	2.16025
24M	71	79	75	75	3.26599
24H	84	82	80	82	1.63299
30L	56	54	49	53	2.94392
30M	62	68	65	65	2.44949
30H	71	76	69	72	2.94392

## Sheet: TP
TP
treatment				average	sd
18L	24.8	26.5	24.6	25.3	0.852447
18M	29.4	31.9	30.2	30.5	1.04243
18H	30.3	33.5	34.6	32.8	1.82392
24L	27.4	29.5	27.4	28.1	0.989949
24M	33.2	35.3	35.6	34.7	1.06771
24H	36.1	38.8	37	37.3	1.1225
30L	26.6	27.7	27.3	27.2	0.454606
30M	30.6	33.6	34.5	32.9	1.66733
30H	34.8	36.7	35	35.5	0.852447

## Sheet: TG
TG
treatment				average	sd
18L	2.66	2.81	2.87	2.78	0.0883176
18M	3.02	3.08	3.2	3.1	0.0748331
18H	3.2	3.28	3.42	3.3	0.0909212
24L	2.48	2.66	2.54	2.56	0.0748331
24M	2.89	3.05	3.06	3	0.0778888
24H	3.15	3.28	3.17	3.2	0.0571548
30L	2.22	2.38	2.3	2.3	0.0653197
30M	2.73	2.85	2.82	2.8	0.0509902
30H	2.99	3.11	3.08	3.06	0.0509902

## Sheet: HCT
HCT
treatment				average	sd
18L	32.2	33.9	31.7	32.6	0.94163
18M	30.2	32.4	30.4	31	0.993311
18H	27.5	29.4	28	28.3	0.804156
24L	34.6	36.9	35.9	35.8	0.94163
24M	32.2	35.5	34.3	34	1.36382
24H	28.8	30.6	31.8	30.4	1.23288
30L	32.2	34.7	33.9	33.6	1.04243
30M	30.9	32.5	31.1	31.5	0.711805
30H	29.6	31.1	29.9	30.2	0.648074

## Sheet: MCH
MCH
treatment				average	sd
18L	41.5	42.7	41.2	41.8	0.648074
18M	39.6	41.2	40.4	40.4	0.653197
18H	37.5	39.2	38.2	38.3	0.697615
24L	43.7	46.2	47.5	45.8	1.57692
24M	39.7	41.8	41.2	40.9	0.883176
24H	42.2	41.8	39.6	41.2	1.1431
30L	45.3	47.8	46.7	46.6	1.02307
30M	44.3	45.6	44.2	44.7	0.637704
30H	43.2	46.1	44.2	44.5	1.20277

## Sheet: HGB
HGB
treatment				average	sd
18L	7.12	7.06	7.06	7.08	0.0282843
18M	6.62	6.8	6.8	6.74	0.0848528
18H	6.05	6.13	6.18	6.12	0.0535413
24L	7.25	7.33	7.44	7.34	0.0778888
24M	6.88	7.03	7	6.97	0.0648074
24H	6.42	6.35	6.46	6.41	0.0454606
30L	7.77	7.85	7.93	7.85	0.0653197
30M	7.56	7.48	7.49	7.51	0.0355903
30H	6.88	6.92	6.75	6.85	0.0725718

[truncated: 3 more sheets: IW, FW, SR]
